# Supplementary material
Source: publisher figshare collection journal article supplement (https://frontiersin.figshare.com/ndownloader/files/15100328)
Supplement: Supplementary file [file 15100328]

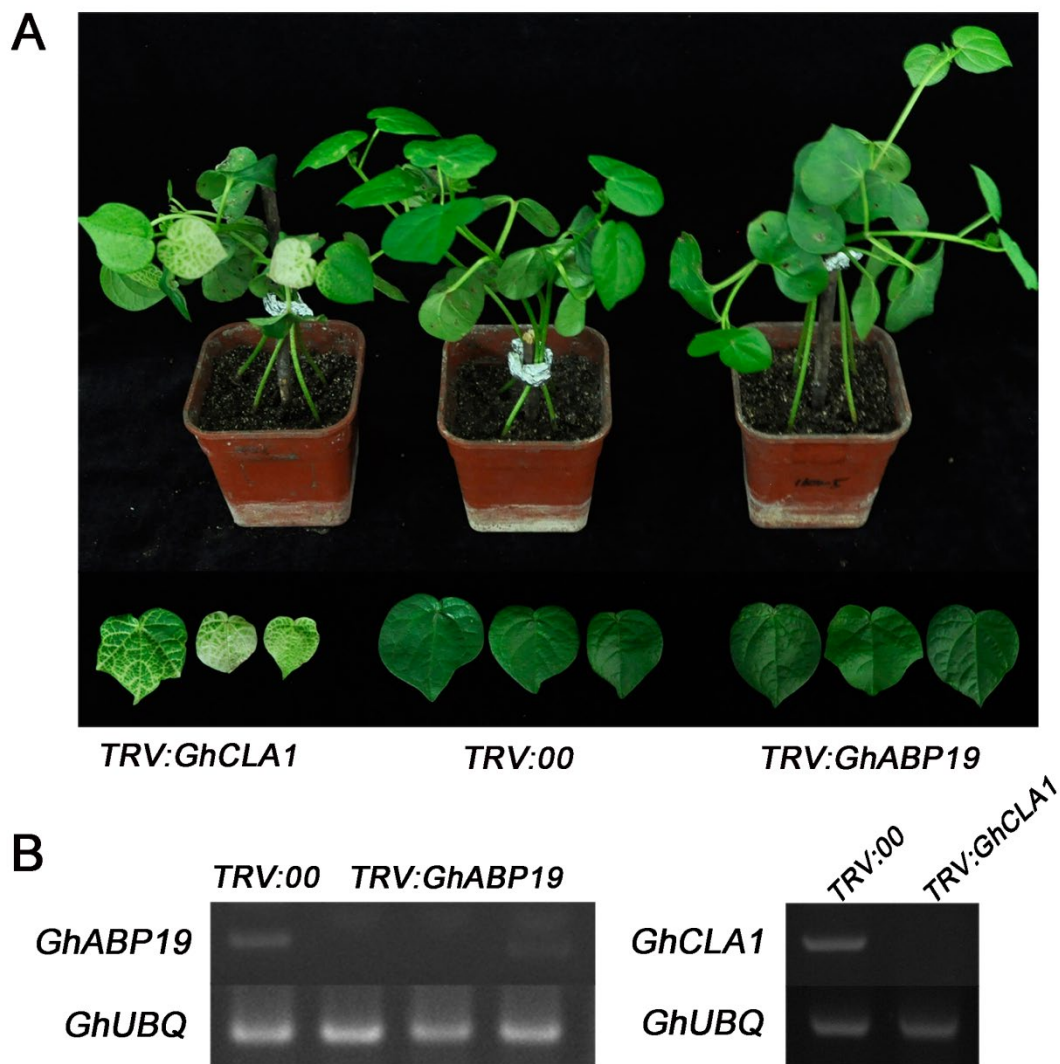

Supplementary Figure 2. VIGS-mediated gene silencing in Zhongzhiiian 2 cotton cultivar. **(A)** The phenotypes of *GhCLA1*-silenced, control and *GhABP19*-silenced cotton plants. The top panel shows the plant phenotypes, the bottom panel shows the leaf phenotypes. **(B)** The expression of *GhABP19* and *GhCLA1* in the control and silenced cotton were analyzed by semi-quantitative RT-PCR. *GhUBQ* was used as a reference gene. The experiments were carried out with three repeats and showed similar results.
